# Supplementary material
Source: publisher figshare collection journal article supplement (https://gsapubs.figshare.com/ndownloader/files/30620385)
Supplement: Supplementary file 1 [file 30620385]

## Sheet: 16VI4.3
Squamish Pluton (Sample 16VI4.3, IRR15-17D)
Step	40Ar/39Arπ	38Ar/39Arπ	37Ar/39Arπ	36Ar/39Arπ	39Ar≤ (mol)	39Ar (%)	40Ar*≥ (%)	40Ar*/39Ar≥	± 1 s.d.	Model Age (Ma)	± 1 s.d.
1*	8698.22	5.75296	0.0148515	30.0999	0.00719706	1.30295e-18	-288.425	931.023	-2.63766	-1396.19	6803.11
2	2244.4	1.48647	0.0148515	7.58585	0.445739	7.93935e-17	-20.4333	17.8054	-0.895757	-70.2112	62.3874
3	434.548	0.285888	0.0148515	1.42473	1.62036	2.12653e-16	9.17556	2.43252	2.04694	30.6606	8.05984
4	166.904	0.106778	0.0148515	0.493724	3.14179	2.7544e-16	19.4919	0.932571	10.9823	64.5221	3.03394
5	144.276	0.0917167	0.0148515	0.414994	4.60362	2.64649e-16	20.3703	0.773314	13.1177	67.3762	2.51257
6	146.334	0.0919731	0.0148515	0.423993	6.13191	2.76682e-16	19.7416	0.752755	12.5848	65.334	2.44853
7	175.164	0.111636	0.0148515	0.52798	7.78182	2.98699e-16	17.5255	0.934115	9.47719	58.1165	3.04948
8	177.21	0.112907	0.0148515	0.532531	9.31005	2.76671e-16	18.2127	1.0083	9.70074	60.3577	3.28749
9	177.423	0.11169	0.0148515	0.53133	10.5797	2.29853e-16	18.7836	0.969586	9.88076	62.2175	3.15817
10	129.803	0.0819326	0.0148515	0.36729	11.8269	2.25791e-16	20.1399	0.780347	14.1123	66.628	2.5364
11	88.5187	0.0553247	0.0148515	0.221728	13.1948	2.47646e-16	22.3141	0.558512	22.2502	73.6758	1.81017
12	52.7445	0.031787	0.0148515	0.0994845	14.6437	2.62315e-16	23.037	0.406195	36.0774	76.0132	1.31718
13	48.1939	0.02908	0.0148515	0.0832752	16.1	2.6364e-16	23.3259	0.369674	39.37	76.9463	1.19916
14	42.8666	0.0254134	0.0148515	0.0662073	18.1084	3.636e-16	23.0943	0.301309	45.3882	76.1983	0.979859
15	39.3523	0.0239516	0.0148515	0.0534544	21.2735	5.73024e-16	23.3876	0.208414	52.6293	77.1454	0.682444
16	39.1386	0.0235188	0.0148515	0.0525425	26.1598	8.84607e-16	23.4462	0.157296	55.2542	77.3348	0.5204
17	41.84	0.0253137	0.0148515	0.0604343	32.4463	1.13812e-15	23.7914	0.136096	53.583	78.4488	0.453988
18	44.2663	0.0263678	0.0148515	0.0676912	40.2727	1.41689e-15	24.0511	0.130191	51.9198	79.2867	0.435714
19	47.5603	0.0283953	0.0148515	0.0769797	53.2267	2.34518e-15	24.5719	0.101046	50.3487	80.9656	0.346574
20	60.5611	0.0375872	0.0148515	0.122816	76.9069	4.28706e-15	23.8878	0.105589	39.006	78.7601	0.359724
21	40.4451	0.0241831	0.0148515	0.0537997	94.5175	3.18823e-15	24.3773	0.07101	58.94	80.3385	0.257451
22	66.3958	0.0416896	0.0148515	0.141933	98.6517	7.48457e-16	24.015	0.24281	34.1655	79.1702	0.791733
23	74.7172	0.0475388	0.0148515	0.169848	99.5382	1.60484e-16	24.0021	0.667447	25.8429	79.1286	2.15597
24	115.135	0.0736687	0.0148515	0.315048	100	8.36037e-17	21.069	1.48109	14.0466	69.643	4.80352
Bulk Ca/K	± 1 s.d.	Bulk Cl/K	± 1 s.d.	Sample Mass (mg)	Total Gas Age (Ma)	± 1 s.d.
0.03	0.000310322	0.000405927	0.000416216	0.248688	76.5281	0.827368
*Crossed-out data was not included in analysis
πRaw data corrected for MS baselines; IC deadtime; mass discrimination; procedural blank; & radioactive decay
≤Total 39Ar normalized to 100% gas delivery to the Mass Spectrometer
≥Corrected for nuclear interferences & atmospheric Ar; Only measurement errors (±1 s.d.) are included.

## Sheet: 16VI4.4
Cloudburst Pluton (Sample 16VI4.4, IRR15-05D)
Step	40Ar/39Arπ	38Ar/39Arπ	37Ar/39Arπ	36Ar/39Arπ	39Ar≤ (mol)	39Ar (%)	40Ar*≥ (%)	40Ar*/39Ar≥	± 1 s.d.	Model Age (Ma)	± 1 s.d.
1*	6619.71	4.03084	0.0148515	21.0406	0.0165665	4.97309e-18	337.821	238.018	4.68892	863.382	483.442
2	1011.89	0.643504	0.0148515	3.24766	0.242845	6.79263e-17	42.2599	8.90501	4.00674	133.457	27.1077
3	186.966	0.122257	0.0148515	0.574053	0.950468	2.12421e-16	15.5713	1.05224	7.76	50.3299	3.35492
4	52.4518	0.0355984	0.0148515	0.119878	2.6451	5.08709e-16	16.6557	0.30006	28.6329	53.7834	0.957934
5	28.0763	0.0196573	0.0148515	0.0373995	5.75285	9.32916e-16	16.9049	0.119853	54.1921	54.5758	0.389575
6	21.4579	0.0154967	0.0148515	0.0151959	10.3968	1.39405e-15	16.9156	0.084127	71.8451	54.6101	0.279425
7	19.8541	0.0147424	0.0148515	0.00949885	16.1453	1.72566e-15	17.0127	0.0784735	78.9826	54.9189	0.262362
8	19.4253	0.0142876	0.0148515	0.00793923	22.1721	1.80917e-15	17.0496	0.0557356	81.0601	55.0359	0.194958
9	19.9382	0.0144144	0.0148515	0.00948928	27.5317	1.6089e-15	17.0996	0.0627595	78.6327	55.1951	0.215527
10	19.9909	0.0143867	0.0148515	0.00909718	31.8213	1.2877e-15	17.2694	0.081082	77.6158	55.7347	0.270509
11	21.7957	0.0156399	0.0148515	0.0144644	35.6083	1.13682e-15	17.4718	0.0834492	71.7396	56.378	0.277873
12	22.0614	0.0156568	0.0148515	0.0149506	39.0114	1.02155e-15	17.5923	0.0967137	70.6267	56.7607	0.318411
13	20.4604	0.0145722	0.0148515	0.00950357	42.1552	9.43742e-16	17.6176	0.111593	74.8327	56.8409	0.36423
14	19.7265	0.0141804	0.0148515	0.006895	45.2627	9.32846e-16	17.6626	0.125966	77.3156	56.9838	0.408795
15	20.1642	0.0145212	0.0148515	0.00817544	48.651	1.01713e-15	17.7179	0.0850109	76.9539	57.1595	0.282836
16	20.4552	0.0147051	0.0148515	0.0091045	52.5757	1.17816e-15	17.7315	0.0946226	77.3486	57.2028	0.31211
17	21.876	0.0156533	0.0148515	0.0134648	57.1453	1.37175e-15	17.8506	0.0755728	74.3878	57.5807	0.254538
18	22.8654	0.016207	0.0148515	0.0167701	62.1793	1.51114e-15	17.8531	0.0746514	72.0162	57.5889	0.251785
19	23.6097	0.016993	0.0148515	0.0190817	67.4044	1.56854e-15	17.9072	0.0750038	70.3229	57.7606	0.252902
20	24.6668	0.0178339	0.0148515	0.0222357	72.835	1.63018e-15	18.0227	0.0739751	68.1355	58.1273	0.249967
21	25.8071	0.0184282	0.0148515	0.0255209	79.765	2.08034e-15	18.1821	0.0571772	66.8326	58.6331	0.200997
22	23.0984	0.0163173	0.0148515	0.0159538	87.5163	2.32685e-15	18.3298	0.0589181	75.2806	59.1015	0.206239
23	21.8604	0.0150612	0.0148515	0.0108285	95.4859	2.39239e-15	18.6221	0.0465292	80.6973	60.0284	0.172057
24	22.5101	0.0154294	0.0148515	0.0123271	100	1.35508e-15	18.8244	0.10147	76.3455	60.6697	0.333811
Bulk Ca/K	± 1 s.d.	Bulk Cl/K	± 1 s.d.	Sample Mass (mg)	Total Gas Age (Ma)	± 1 s.d.
0.03	0.000306328	0.000112614	0.00011568	0.423981	57.0009	0.292181
*Crossed-out data was not included in analysis
πRaw data corrected for MS baselines; IC deadtime; mass discrimination; procedural blank; & radioactive decay
≤Total 39Ar normalized to 100% gas delivery to the Mass Spectrometer
≥Corrected for nuclear interferences & atmospheric Ar; Only measurement errors (±1 s.d.) are included.

## Sheet: 16VI5.1A
Pemberton Dike Complex (Sample 16VI5.1A, IRR15-07D)
Step	40Ar/39Arπ	38Ar/39Arπ	37Ar/39Arπ	36Ar/39Arπ	39Ar≤ (mol)	39Ar (%)	40Ar*≥ (%)	40Ar*/39Ar≥	± 1 s.d.	Model Age (Ma)	± 1 s.d.
1*	723.92	0.396579	0.0148515	2.17165	0.0485877	8.26331e-18	75.5479	28.1232	7.02765	233.9	81.6635
2	330.548	0.210872	0.0148515	1.02831	0.367702	5.42718e-17	23.5294	3.64351	6.12502	76.1517	11.5471
3	59.0728	0.0404716	0.0148515	0.146056	1.42817	1.80355e-16	15.4609	0.594596	20.5589	50.3987	1.91287
4	67.938	0.0475766	0.0148515	0.182209	3.4403	3.42202e-16	13.5321	0.464209	17.703	44.1878	1.49885
5	32.612	0.0240187	0.0148515	0.057211	6.35966	4.96496e-16	15.5256	0.247103	40.3563	50.6069	0.797779
6	22.639	0.0170239	0.0148515	0.022443	9.84861	5.93367e-16	15.9329	0.178809	57.8502	51.9156	0.579433
7	21.2932	0.016156	0.0148515	0.0172937	13.6178	6.41032e-16	16.1246	0.138945	62.4223	52.5311	0.452843
8	30.0526	0.0217543	0.0148515	0.0476366	17.3359	6.3233e-16	15.8247	0.169527	45.6659	51.5681	0.549932
9	27.894	0.0201276	0.0148515	0.0400656	20.9694	6.17956e-16	15.9266	0.172112	48.8519	51.8952	0.558123
10	24.353	0.0174587	0.0148515	0.0273102	24.3864	5.81119e-16	16.1938	0.180232	55.1578	52.7534	0.583861
11	20.6542	0.0154427	0.0148515	0.0146378	27.6936	5.62456e-16	16.2785	0.142766	63.0305	53.0251	0.464931
12	19.2505	0.0147222	0.0148515	0.00778275	30.9701	5.57249e-16	16.9215	0.16717	69.1491	55.0881	0.542143
13	18.0484	0.0134731	0.0148515	0.00484494	33.9923	5.13979e-16	16.5965	0.152589	70.0026	54.0455	0.496005
14	18.4402	0.0137824	0.0148515	0.00520785	37.0989	5.28341e-16	16.88	0.146498	70.4907	54.9548	0.476719
15	18.8079	0.0134919	0.0148515	0.00566606	40.3943	5.60441e-16	17.1108	0.137987	71.2991	55.6949	0.449869
16	18.3995	0.013441	0.0148515	0.00441582	44.8045	7.50047e-16	17.0757	0.11337	76.6478	55.5824	0.372561
17	18.5571	0.0137867	0.0148515	0.00540924	52.5679	1.32033e-15	16.9367	0.0902788	81.5813	55.1369	0.3007
18	18.9107	0.01394	0.0148515	0.00534523	61.3334	1.49075e-15	17.3094	0.0576142	82.97	56.3314	0.202487
19	19.7467	0.0142651	0.0148515	0.00637763	69.1409	1.32781e-15	17.8372	0.0766541	81.3083	58.0218	0.2599
20	20.9907	0.0147684	0.0148515	0.00903461	76.8631	1.31333e-15	18.288	0.077564	78.8072	59.464	0.263155
21	23.6255	0.0164639	0.0148515	0.0159878	85.2866	1.43258e-15	18.8468	0.075091	73.4586	61.2506	0.25639
22	23.7523	0.0160119	0.0148515	0.0151075	92.5393	1.23348e-15	19.2364	0.129748	73.6719	62.4951	0.424433
23	23.0634	0.0151497	0.0148515	0.0112415	97.3508	8.18287e-16	19.7018	0.116587	74.0149	63.9805	0.383743
24	25.9245	0.017261	0.0148515	0.0184051	100	4.50548e-16	20.4241	0.207587	63.0736	66.2836	0.668638
Bulk Ca/K	± 1 s.d.	Bulk Cl/K	± 1 s.d.	Sample Mass (mg)	Total Gas Age (Ma)	± 1 s.d.
0.03	0.000310176	8.36397e-05	9.69199e-05	0.23817	55.8159	0.415869
*Crossed-out data was not included in analysis
πRaw data corrected for MS baselines; IC deadtime; mass discrimination; procedural blank; & radioactive decay
≤Total 39Ar normalized to 100% gas delivery to the Mass Spectrometer
≥Corrected for nuclear interferences & atmospheric Ar; Only measurement errors (±1 s.d.) are included.

## Sheet: 16VI5.6
Bendor Pluton (Sample 16VI5.6, IRR15-08D)
Step	40Ar/39Arπ	38Ar/39Arπ	37Ar/39Arπ	36Ar/39Arπ	39Ar≤ (mol)	39Ar (%)	40Ar*≥ (%)	40Ar*/39Ar≥	± 1 s.d.	Model Age (Ma)	± 1 s.d.
1*	3515.26	1.48822	0.0148515	5.89234	0.473444	1.20981e-17	1756.05	75.1824	46.7552	2600.08	58.9972
2	2179.3	1.14709	0.0148515	5.22084	1.15706	1.74687e-17	620.566	34.1062	26.453	1372.54	52.8384
3	527.709	0.293234	0.0148515	1.1907	2.33109	3.00003e-17	172.21	7.84783	27.5659	495.873	19.7687
4	320.354	0.175389	0.0148515	0.723399	4.40968	5.31151e-17	104.371	3.95179	27.8215	316.447	10.9982
5	232.674	0.124703	0.0148515	0.486347	7.649	8.27753e-17	87.4659	2.0702	32.6567	268.81	5.92292
6	200.745	0.107162	0.0148515	0.398445	10.6678	7.71397e-17	81.7805	2.02066	34.2934	252.503	5.83272
7	253.888	0.131194	0.0148515	0.490921	14.4682	9.71131e-17	107.314	1.75658	37.8055	324.61	4.8832
8	124.08	0.0664164	0.0148515	0.226817	19.0089	1.16031e-16	56.3561	1.11547	37.7818	177.721	3.35957
9	98.2598	0.0538404	0.0148515	0.174568	25.051	1.54395e-16	46.1357	0.811507	39.3953	146.763	2.48829
10	52.9851	0.029233	0.0148515	0.081902	31.8807	1.74523e-16	28.5271	0.658615	40.9515	92.1475	2.0784
11	53.7358	0.030478	0.0148515	0.0831917	40.328	2.15858e-16	28.8928	0.461749	42.9835	93.2987	1.45954
12	68.5689	0.0375352	0.0148515	0.108108	50.3567	2.56266e-16	36.2869	0.589132	45.4007	116.419	1.83822
13	54.8934	0.0318218	0.0148515	0.0998709	57.311	1.77705e-16	25.0706	0.670357	35.1767	81.2297	2.12715
14	66.5161	0.0395779	0.0148515	0.141158	63.0712	1.47194e-16	24.3667	0.675665	28.2389	78.9984	2.14641
15	78.2759	0.0489967	0.0148515	0.191009	68.6442	1.42407e-16	21.2428	0.876407	21.5199	69.0616	2.79725
16	73.6904	0.0470238	0.0148515	0.176946	74.6927	1.5456e-16	20.856	0.67435	22.5421	67.8274	2.15471
17	89.0445	0.0565684	0.0148515	0.223944	80.7584	1.55e-16	22.1783	1.14803	20.5696	72.043	3.65726
18	129.762	0.0795994	0.0148515	0.324549	86.311	1.41888e-16	32.8597	1.15488	21.8665	105.74	3.6128
19	215.892	0.12836	0.0148515	0.559742	90.1617	9.83967e-17	48.7703	1.99839	19.8681	154.794	6.08236
20	287.459	0.174468	0.0148515	0.755444	92.7547	6.62603e-17	61.909	2.71147	18.682	194.321	8.07319
21	421.752	0.250903	0.0148515	1.16118	94.7132	5.00457e-17	75.0657	4.83945	15.6417	233.052	14.0986
22	428.572	0.253163	0.0148515	1.15069	97.0431	5.95385e-17	85.0178	3.85589	17.8064	261.807	11.0586
23	507.854	0.311352	0.0148515	1.4647	98.8644	4.65383e-17	70.5486	5.80471	12.3684	219.848	17.0331
24	782.924	0.491543	0.0148515	2.45469	100	2.90195e-17	50.0458	10.7989	5.66632	158.67	32.7761
Bulk Ca/K	± 1 s.d.	Bulk Cl/K	± 1 s.d.	Sample Mass (mg)	Total Gas Age (Ma)	± 1 s.d.
0.03	0.000360351	0.00299929	0.00299944	0.0356951	81.7115	3.08958
*Crossed-out data was not included in analysis
πRaw data corrected for MS baselines; IC deadtime; mass discrimination; procedural blank; & radioactive decay
≤Total 39Ar normalized to 100% gas delivery to the Mass Spectrometer
≥Corrected for nuclear interferences & atmospheric Ar; Only measurement errors (±1 s.d.) are included.

## Sheet: 16VI6.8
Mission Ridge Pluton (16VI6.8, IRR15-10D)
Step	40Ar/39Arπ	38Ar/39Arπ	37Ar/39Arπ	36Ar/39Arπ	39Ar≤ (mol)	39Ar (%)	40Ar*≥ (%)	40Ar*/39Ar≥	± 1 s.d.	Model Age (Ma)	± 1 s.d.
1*	5897.74	3.86842	0.0148515	20.4828	0.0528718	1.05004e-17	-217.598	120.766	-3.52385	-925.823	671.446
2	2266.81	1.49099	0.0148515	7.82309	0.395231	6.79929e-17	-68.8551	18.6484	-2.9812	-245.072	71.0948
3	394.989	0.26397	0.0148515	1.33209	1.37259	1.94105e-16	-2.72551	2.61788	-0.664778	-9.09358	8.75654
4	144.896	0.098861	0.0148515	0.459844	3.04715	3.32569e-16	7.59914	0.701602	4.94576	25.1149	2.30301
5	80.2996	0.0559082	0.0148515	0.233658	5.10489	4.0867e-16	10.5333	0.433611	12.0486	34.7192	1.41652
6	44.1781	0.0327691	0.0148515	0.106788	7.50085	4.75839e-16	12.29	0.277269	24.4355	40.4451	0.904305
7	37.8681	0.0289321	0.0148515	0.085113	10.0203	5.00357e-16	12.4513	0.224577	28.502	40.9701	0.733149
8	40.2487	0.0302025	0.0148515	0.0941009	12.2864	4.50068e-16	12.1484	0.261468	26.0047	39.9845	0.853175
9	42.3066	0.0308911	0.0148515	0.0999012	14.2721	3.94353e-16	12.4746	0.346105	25.1058	41.0458	1.1276
10	41.7874	0.0309095	0.0148515	0.0985096	15.9641	3.36038e-16	12.371	0.354692	24.5213	40.7087	1.15568
11	52.1616	0.0379511	0.0148515	0.134336	17.5856	3.22025e-16	12.0489	0.372126	19.6874	39.6603	1.21296
12	47.5947	0.0349018	0.0148515	0.119815	19.2366	3.279e-16	11.8174	0.465836	20.926	38.9065	1.51836
13	34.6122	0.026615	0.0148515	0.0741759	20.902	3.3075e-16	12.4608	0.316382	28.7029	41.001	1.03108
14	37.6486	0.0283366	0.0148515	0.0865954	22.7886	3.74671e-16	11.7892	0.279947	25.9573	38.8148	0.913671
15	36.7694	0.0285585	0.0148515	0.08208	25.2035	4.79601e-16	12.2581	0.233938	28.6145	40.3415	0.763695
16	32.1121	0.0248334	0.0148515	0.0653986	28.0904	5.73344e-16	12.5813	0.196196	33.8304	41.3929	0.64109
17	31.2096	0.0243508	0.0148515	0.0624641	31.2657	6.30608e-16	12.5549	0.173782	35.0444	41.3071	0.568577
18	31.3084	0.0246182	0.0148515	0.0629158	34.9506	7.31842e-16	12.5188	0.213707	35.4781	41.1896	0.697855
19	36.3527	0.0283131	0.0148515	0.0801356	39.06	8.16133e-16	12.4219	0.160894	31.1173	40.8744	0.526969
20	64.7982	0.0464779	0.0148515	0.179964	44.5674	1.09376e-15	11.0627	0.227901	16.3988	36.4467	0.74527
21	51.2155	0.0375134	0.0148515	0.132087	55.3178	2.13505e-15	11.7742	0.130475	22.3932	38.7659	0.428876
22	29.439	0.0233691	0.0148515	0.0555266	80.9576	5.09208e-15	12.8555	0.053599	42.8361	42.2847	0.185182
23	28.753	0.0228102	0.0148515	0.0527548	96.0307	2.99354e-15	12.9971	0.0644721	43.7234	42.7447	0.218914
24	44.8281	0.0338249	0.0148515	0.1085	100	7.88305e-16	12.4289	0.180254	25.6155	40.8971	0.589581
Bulk Ca/K	± 1 s.d.	Bulk Cl/K	± 1 s.d.	Sample Mass (mg)	Total Gas Age (Ma)	± 1 s.d.
0.03	0.000308792	4.30304e-05	7.1322e-05	0.276257	40.0078	0.541681
*Crossed-out data was not included in analysis
πRaw data corrected for MS baselines; IC deadtime; mass discrimination; procedural blank; & radioactive decay
≤Total 39Ar normalized to 100% gas delivery to the Mass Spectrometer
≥Corrected for nuclear interferences & atmospheric Ar; Only measurement errors (±1 s.d.) are included.

## Sheet: 16VI7.1
Mt. Lytton Complex (Sample 16VI7.1, IRR15-18D)
Step	40Ar/39Arπ	38Ar/39Arπ	37Ar/39Arπ	36Ar/39Arπ	39Ar≤ (mol)	39Ar (%)	40Ar*≥ (%)	40Ar*/39Ar≥	± 1 s.d.	Model Age (Ma)	± 1 s.d.
1*	4689.44	3.0844	0.0148515	16.1218	0.222688	5.91608e-18	-123.905	185.212	-2.39101	-476.117	814.445
2	2247.87	1.48132	0.0148515	7.72527	1.1741	2.52758e-17	-58.5921	38.0823	-2.47936	-209.605	144.464
3	472.422	0.308055	0.0148515	1.57225	3.27367	5.57787e-17	3.0061	5.39573	0.572945	10.1242	18.1214
4	131.45	0.0883138	0.0148515	0.398505	6.69953	9.10138e-17	12.4667	1.5408	7.62619	41.6208	5.08552
5	107.138	0.0739515	0.0148515	0.315349	10.5429	1.02106e-16	12.9821	1.28554	9.56802	43.3208	4.23921
6	80.6939	0.0567078	0.0148515	0.225801	14.3883	1.02159e-16	13.2735	0.983307	12.1527	44.2814	3.24112
7	95.9105	0.0665271	0.0148515	0.277122	17.9375	9.42903e-17	13.1676	1.31814	10.3829	43.9324	4.34521
8	93.9451	0.0732093	0.0148515	0.269576	22.8341	1.30088e-16	13.455	1.10297	11.5643	44.8794	3.63422
9	143.813	0.0977432	0.0148515	0.438933	27.0241	1.11314e-16	12.7598	1.38138	7.50595	42.5878	4.55701
10	90.5949	0.0602508	0.0148515	0.253402	32.4692	1.44656e-16	14.9337	0.801979	13.4851	49.7444	2.63593
11	62.7035	0.0422484	0.0148515	0.15422	38.6382	1.6389e-16	16.6542	0.779425	20.6919	55.3882	2.55412
12	41.5073	0.0297701	0.0148515	0.0847951	44.1245	1.45754e-16	16.1854	0.739945	26.3399	53.8523	2.42687
13	43.1084	0.0330524	0.0148515	0.0980968	49.4921	1.42599e-16	13.8152	0.700087	21.7594	46.0657	2.30584
14	45.1139	0.0333707	0.0148515	0.106371	55.3402	1.55364e-16	13.3504	0.569493	20.9015	44.5347	1.87764
15	48.0062	0.0359298	0.0148515	0.113055	61.8187	1.72113e-16	14.2471	0.84658	21.939	47.4871	2.78581
16	52.0738	0.0400205	0.0148515	0.129774	68.3024	1.7225e-16	13.3229	0.689807	19.3103	44.4444	2.27399
17	67.1271	0.0495762	0.0148515	0.18346	73.7664	1.4516e-16	12.3479	0.777297	14.1597	41.2286	2.56663
18	96.0122	0.070356	0.0148515	0.279471	81.4603	2.04401e-16	12.568	0.737148	11.3973	41.9549	2.43318
19	147.026	0.105127	0.0148515	0.458136	91.3808	2.63555e-16	10.2401	0.863209	6.47753	34.2571	2.86098
20	221.827	0.167946	0.0148515	0.696374	95.2176	1.01933e-16	13.9118	2.16821	5.55537	46.3837	7.13726
21	231.294	0.16862	0.0148515	0.710715	97.8663	7.03672e-17	19.0979	2.24735	7.00289	63.3741	7.32872
22	356.51	0.259667	0.0148515	1.13603	99.0685	3.19376e-17	17.3306	5.72846	3.87044	57.6022	18.7393
23	494.988	0.346056	0.0148515	1.59238	99.7168	1.72223e-17	19.56	15.3482	2.94483	64.8804	50.0055
24	881.047	0.568161	0.0148515	3.03001	100	7.52422e-18	-23.6002	32.2108	-1.86219	-81.5209	113.816
Bulk Ca/K	± 1 s.d.	Bulk Cl/K	± 1 s.d.	Sample Mass (mg)	Total Gas Age (Ma)	± 1 s.d.
0.03	0.000362793	0.00130685	0.00132836	0.0364154	44.1131	3.98978
*Crossed-out data was not included in analysis
πRaw data corrected for MS baselines; IC deadtime; mass discrimination; procedural blank; & radioactive decay
≤Total 39Ar normalized to 100% gas delivery to the Mass Spectrometer
≥Corrected for nuclear interferences & atmospheric Ar; Only measurement errors (±1 s.d.) are included.

## Sheet: 16VI8.2
Breakenridge Pluton (Sample 16VI8.2, IRR15-21D)
Step	40Ar/39Arπ	38Ar/39Arπ	37Ar/39Arπ	36Ar/39Arπ	39Ar≤ (mol)	39Ar (%)	40Ar*≥ (%)	40Ar*/39Ar≥	± 1 s.d.	Model Age (Ma)	± 1 s.d.
1*	3279.3	2.18966	0.0148515	11.0944	0.137223	7.07942e-18	-33.065	90.8181	-0.895816	-115.764	328.387
2	1496.88	1.00596	0.0148515	4.8549	0.830557	3.57695e-17	47.3923	19.2184	3.00258	153.954	59.8418
3	293.503	0.20672	0.0148515	0.843242	2.27854	7.47023e-17	41.7397	2.57673	12.5523	136.267	8.10474
4	156.267	0.114728	0.0148515	0.444323	4.36844	1.07819e-16	23.6049	1.31688	12.8775	78.3227	4.27755
5	71.3803	0.0553841	0.0148515	0.18332	6.98173	1.34821e-16	16.6427	2.51401	17.8951	55.5731	8.26717
6	81.1241	0.0628082	0.0148515	0.217481	10.0076	1.56107e-16	16.1875	0.903686	16.2204	54.0754	2.97511
7	61.2493	0.0478893	0.0148515	0.1573	13.4099	1.75524e-16	14.2804	0.786573	18.3419	47.7882	2.59861
8	48.4749	0.0385956	0.0148515	0.119078	16.8645	1.78226e-16	12.9176	0.588522	19.9252	43.2819	1.94951
9	28.7788	0.0274718	0.0148515	0.064085	20.4363	1.84269e-16	9.64012	0.623467	21.6366	32.3984	2.07719
10	22.3633	0.0219375	0.0148515	0.043619	24.85	2.27708e-16	9.33491	0.454786	26.5727	31.3815	1.51637
11	19.8548	0.0206268	0.0148515	0.0346554	31.1875	3.26956e-16	9.50259	0.336394	33.0571	31.9402	1.12175
12	19.041	0.0185985	0.0148515	0.0344834	36.6445	2.8153e-16	8.74014	0.333866	29.7621	29.3982	1.11474
13	17.3301	0.0214607	0.0148515	0.0287018	41.7741	2.64637e-16	8.75544	0.35129	30.9216	29.4493	1.17281
14	17.2225	0.0188639	0.0148515	0.0288199	48.2795	3.35617e-16	8.61249	0.364911	33.2732	28.9723	1.21851
15	17.4256	0.0222975	0.0148515	0.0288134	55.6298	3.79208e-16	8.81756	0.281757	35.1414	29.6565	0.940934
16	19.2312	0.0210521	0.0148515	0.031693	63.9308	4.28252e-16	9.76346	0.241479	37.4971	32.8091	0.80561
17	23.4828	0.0239797	0.0148515	0.0429258	71.5999	3.95655e-16	10.6614	0.239157	34.5585	35.7968	0.796858
18	30.3691	0.0289584	0.0148515	0.0576262	78.645	3.6346e-16	13.1588	0.300101	34.2773	44.0804	0.995268
19	34.6376	0.0314893	0.0148515	0.0662488	86.7937	4.20396e-16	14.853	0.30275	35.7286	49.6782	1.00149
20	39.3562	0.0358907	0.0148515	0.0761319	97.4051	5.47448e-16	16.6209	0.209425	37.1988	55.5012	0.693538
21	133.669	0.102847	0.0148515	0.315465	98.7436	6.90528e-17	39.4782	1.63453	22.4458	129.142	5.16338
22	179.674	0.148826	0.0148515	0.497884	99.1438	2.06445e-17	31.0209	5.82798	9.6793	102.244	18.6752
23	208.194	0.14399	0.0148515	0.609013	99.4264	1.45816e-17	26.3616	7.59559	6.46826	87.2517	24.542
24	145.792	0.122401	0.0148515	0.431695	100	2.95924e-17	16.8998	4.38939	6.92538	56.4182	14.427
Bulk Ca/K	± 1 s.d.	Bulk Cl/K	± 1 s.d.	Sample Mass (mg)	Total Gas Age (Ma)	± 1 s.d.
0.03	0.000334741	0.00170715	0.00171631	0.0704286	32.9658	1.1309
*Crossed-out data was not included in analysis
πRaw data corrected for MS baselines; IC deadtime; mass discrimination; procedural blank; & radioactive decay
≤Total 39Ar normalized to 100% gas delivery to the Mass Spectrometer
≥Corrected for nuclear interferences & atmospheric Ar; Only measurement errors (±1 s.d.) are included.

## Sheet: 16VI8.3
Fir Creek Batholith (Sample 16VI8.3, IRR15-29D)
Step	40Ar/39Arπ	38Ar/39Arπ	37Ar/39Arπ	36Ar/39Arπ	39Ar≤ (mol)	39Ar (%)	40Ar*≥ (%)	40Ar*/39Ar≥	± 1 s.d.	Model Age (Ma)	± 1 s.d.
1*	1668.22	1.10687	0.0148515	4.63299	0.258263	4.26059e-18	284.988	67.0859	12.1091	782.188	149.408
2	1189.4	0.832183	0.0148515	3.37111	1.22519	1.59515e-17	182.915	23.8831	13.3277	539.215	60.8616
3	610.653	0.417523	0.0148515	1.61411	2.52084	2.13745e-17	128.739	10.2032	17.2283	395.598	28.1586
4	352.336	0.25049	0.0148515	0.90574	5.01106	4.10814e-17	81.914	4.5744	19.3462	261.534	13.6007
5	174.815	0.122538	0.0148515	0.406488	10.4152	8.91523e-17	53.4491	1.75238	25.7504	174.884	5.47031
6	121.051	0.0855766	0.0148515	0.252266	16.5455	1.01132e-16	45.7291	1.46168	30.502	150.648	4.62481
7	219.63	0.160492	0.0148515	0.461869	23.0969	1.0808e-16	81.73	1.65969	33.1365	260.987	4.94779
8	185.463	0.136163	0.0148515	0.411104	31.0472	1.31157e-16	62.7189	1.36835	30.1931	203.561	4.20967
9	98.7939	0.0681919	0.0148515	0.224936	38.5652	1.24026e-16	31.6318	0.868735	25.8565	105.533	2.81941
10	91.1106	0.0630026	0.0148515	0.214429	46.4837	1.30633e-16	27.0855	0.841545	23.8719	90.74	2.75276
11	82.6311	0.0554337	0.0148515	0.20679	53.8863	1.22122e-16	20.8865	1.06047	19.6044	70.3714	3.50572
12	108.9	0.0771463	0.0148515	0.257967	63.4308	1.57456e-16	31.8767	0.959406	25.0123	106.327	3.11153
13	120.226	0.0861522	0.0148515	0.302268	72.6958	1.52846e-16	29.9761	0.974384	21.5145	100.16	3.17037
14	135.851	0.0933028	0.0148515	0.390047	78.6551	9.83114e-17	19.3928	1.46126	11.7141	65.429	4.84274
15	171.025	0.116027	0.0148515	0.510583	83.492	7.97948e-17	18.5794	2.19748	8.94892	62.7319	7.29269
16	193.527	0.128965	0.0148515	0.591692	88.0247	7.4776e-17	16.8656	2.03748	7.25171	57.0358	6.78305
17	247.065	0.164574	0.0148515	0.770837	91.953	6.48055e-17	16.9187	3.17137	5.79169	57.2127	10.5564
18	354.551	0.236303	0.0148515	1.13226	94.6852	4.50744e-17	16.4974	4.32935	3.93424	55.8098	14.422
19	669.337	0.446582	0.0148515	2.13477	96.1477	2.41266e-17	31.9759	11.2894	4.04574	106.648	36.5621
20	1116.43	0.769956	0.0148515	3.48957	97.0886	1.55212e-17	74.581	25.0029	5.71698	239.606	75.2219
21	1324.76	0.902069	0.0148515	4.15428	97.8807	1.30683e-17	84.4557	23.1846	5.45511	269.072	68.6217
22	1495.81	1.03141	0.0148515	4.67893	98.5385	1.0852e-17	98.8632	34.6421	5.60172	311.219	100.165
23	1262.44	0.858035	0.0148515	3.9117	99.3294	1.30467e-17	94.5578	27.2268	6.36222	298.727	79.272
24	1334.35	0.904384	0.0148515	4.11947	100	1.10636e-17	104.442	35.2036	6.53467	327.276	100.887
Bulk Ca/K	± 1 s.d.	Bulk Cl/K	± 1 s.d.	Sample Mass (mg)	Total Gas Age (Ma)	± 1 s.d.
0.03	0.000397126	0.00766307	0.00766346	0.0222282	108.115	7.72846
*Crossed-out data was not included in analysis
πRaw data corrected for MS baselines; IC deadtime; mass discrimination; procedural blank; & radioactive decay
≤Total 39Ar normalized to 100% gas delivery to the Mass Spectrometer
≥Corrected for nuclear interferences & atmospheric Ar; Only measurement errors (±1 s.d.) are included.

## Sheet: 16VI8.4
Scuzzy Pluton (Sample 16VI8.4, IRR15-15D)
Step	40Ar/39Arπ	38Ar/39Arπ	37Ar/39Arπ	36Ar/39Arπ	39Ar≤ (mol)	39Ar (%)	40Ar*≥ (%)	40Ar*/39Ar≥	± 1 s.d.	Model Age (Ma)	± 1 s.d.
1*	9995.92	9.03274	0.0148515	30.2952	0.0490852	7.54855e-19	950.979	1376.84	6.86397	1838.85	1669.42
2	3212.9	2.42537	0.0148515	10.5322	0.313834	4.07144e-18	68.3912	143.657	1.74096	216.298	428.158
3	258.091	0.259367	0.0148515	0.787454	1.16334	1.30642e-17	22.9835	10.0313	4.78384	75.6188	32.3225
4	138.36	0.0912718	0.0148515	0.416969	2.80169	2.51953e-17	13.8645	4.39671	5.46601	45.9944	14.4015
5	94.757	0.065251	0.0148515	0.274208	4.89888	3.22515e-17	12.8841	3.3332	6.97106	42.7801	10.9375
6	68.5246	0.0579928	0.0148515	0.174403	7.33634	3.74845e-17	16.4493	2.59342	11.2653	54.4408	8.45539
7	50.4782	0.0456132	0.0148515	0.126274	10.0155	4.12013e-17	12.7724	2.3338	10.5575	42.4135	7.65975
8	50.0354	0.0553315	0.0148515	0.122284	12.7315	4.17676e-17	13.5209	2.0866	11.3069	44.8684	6.83921
9	51.7678	0.0302234	0.0148515	0.144233	15.4971	4.25307e-17	8.70004	2.23361	7.24608	28.9983	7.38551
10	49.9323	0.0423059	0.0148515	0.125838	18.0712	3.95854e-17	12.3565	2.44628	10.0205	41.048	8.03498
11	56.4512	0.0456913	0.0148515	0.14928	20.6246	3.92675e-17	11.8767	2.26251	9.10621	39.4716	7.43789
12	59.0902	0.0422128	0.0148515	0.14066	23.0857	3.78487e-17	17.0892	2.26509	12.5807	56.5259	7.37654
13	57.5958	0.0430236	0.0148515	0.15951	25.7396	4.0813e-17	9.96717	2.61201	7.7404	33.1832	8.61668
14	54.6395	0.0353707	0.0148515	0.138295	29.2223	5.35588e-17	13.3448	1.746	12.257	44.291	5.72476
15	50.1761	0.0312054	0.0148515	0.128348	33.8746	7.15456e-17	11.8509	1.34176	13.0551	39.3866	4.41141
16	53.9668	0.0420872	0.0148515	0.142271	40.3325	9.93126e-17	11.4849	1.19038	13.8013	38.1829	3.91639
17	57.5738	0.0413392	0.0148515	0.146928	49.5157	1.41223e-16	13.7016	0.690043	17.5215	45.4606	2.26189
18	49.3286	0.0348232	0.0148515	0.120968	61.7752	1.88533e-16	13.2069	0.564374	20.3879	43.839	1.85194
19	41.8199	0.0313081	0.0148515	0.0948858	87.1739	3.90593e-16	13.4853	0.287789	27.3661	44.7517	0.945625
20	60.0855	0.0422388	0.0148515	0.153811	95.0374	1.20929e-16	14.1581	0.848067	16.8205	46.9557	2.77721
21	114.447	0.0828199	0.0148515	0.349401	97.9839	4.53126e-17	10.1245	2.29036	5.67032	33.7021	7.55348
22	369.97	0.265187	0.0148515	1.25649	98.7859	1.23347e-17	-5.17488	12.0174	-0.854699	-17.4722	40.772
23	446.211	0.369609	0.0148515	1.49019	99.5344	1.15108e-17	1.29495	12.6447	0.185355	4.34587	42.3848
24	750.863	0.534661	0.0148515	2.54737	100	7.1597e-18	-9.68487	28.4469	-0.83738	-32.8388	97.3392
Bulk Ca/K	± 1 s.d.	Bulk Cl/K	± 1 s.d.	Sample Mass (mg)	Total Gas Age (Ma)	± 1 s.d.
0.03	0.000399552	0.00181072	0.00201407	0.0211881	41.159	3.61107
*Crossed-out data was not included in analysis
πRaw data corrected for MS baselines; IC deadtime; mass discrimination; procedural blank; & radioactive decay
≤Total 39Ar normalized to 100% gas delivery to the Mass Spectrometer
≥Corrected for nuclear interferences & atmospheric Ar; Only measurement errors (±1 s.d.) are included.

## Sheet: 16VI9.1
Mount Jasper pluton (Sample 16VI9.1, IRR15-13D)
Step	40Ar/39Arπ	38Ar/39Arπ	37Ar/39Arπ	36Ar/39Arπ	39Ar≤ (mol)	39Ar (%)	40Ar*≥ (%)	40Ar*/39Ar≥	± 1 s.d.	Model Age (Ma)	± 1 s.d.
1*	2104.74	1.4527	0.0148515	7.39278	0.0388405	3.02819e-18	-102.453	116.197	-3.34398	-380.652	480.64
2	768.954	0.557028	0.0148515	2.53935	0.560092	4.06393e-17	10.8005	9.87116	1.28481	35.8193	32.4144
3	131.813	0.0966654	0.0148515	0.380847	2.35045	1.39585e-16	18.1022	0.952873	11.8565	59.6382	3.0892
4	118.316	0.0831966	0.0148515	0.303002	5.60664	2.53868e-16	27.8465	0.708516	21.4554	90.9434	2.26049
5	91.7973	0.0579127	0.0148515	0.192145	8.56461	2.30617e-16	34.4253	0.541359	32.9664	111.776	1.71213
6	70.5754	0.0361769	0.0148515	0.115169	10.5569	1.55327e-16	36.1854	0.61667	40.5102	117.308	1.94304
7	54.9198	0.0258314	0.0148515	0.0570872	12.3532	1.4005e-16	37.8706	0.627729	50.0184	122.59	1.97253
8	55.6848	0.0261119	0.0148515	0.0633452	14.1077	1.36789e-16	36.7672	0.68602	47.7657	119.134	2.15799
9	57.7581	0.0284438	0.0148515	0.071959	15.7987	1.31841e-16	36.2688	0.757306	45.4232	117.57	2.38275
10	67.6941	0.0358565	0.0148515	0.105907	17.6416	1.43677e-16	36.0694	0.896129	41.0052	116.944	2.81839
11	65.4959	0.0366015	0.0148515	0.105008	19.7163	1.61757e-16	34.1394	0.620081	40.8859	110.875	1.95986
12	66.0147	0.036642	0.0148515	0.111955	22.0321	1.8055e-16	32.5842	0.656572	39.667	105.97	2.07953
13	63.7617	0.036196	0.0148515	0.111767	24.7508	2.11964e-16	30.3874	0.483909	39.209	99.0176	1.54112
14	56.2515	0.0318677	0.0148515	0.0869952	28.7282	3.10092e-16	30.2729	0.438645	46.1175	98.6548	1.39853
15	53.1415	0.0306145	0.0148515	0.0789702	34.7988	4.73298e-16	29.5589	0.241487	49.8507	96.3888	0.779617
16	49.8004	0.0287557	0.0148515	0.0649192	43.0476	6.43117e-16	30.4129	0.244865	55.9791	99.0985	0.789719
17	49.7945	0.029033	0.0148515	0.0607522	51.4936	6.58485e-16	31.6511	0.191345	58.3781	103.02	0.623709
18	47.8541	0.0286506	0.0148515	0.0533428	61.8883	8.10424e-16	31.9229	0.159455	62.0489	103.88	0.526468
19	48.6381	0.0285964	0.0148515	0.0522144	72.0063	7.88847e-16	33.0437	0.173342	63.1447	107.421	0.568988
20	52.8874	0.0317526	0.0148515	0.0624284	80.3485	6.50393e-16	34.2436	0.198747	59.6938	111.203	0.646492
21	49.1728	0.027399	0.0148515	0.0454379	90.6664	8.04438e-16	35.6016	0.188114	67.4359	115.475	0.614392
22	57.1668	0.032184	0.0148515	0.0666972	97.2115	5.10287e-16	37.2485	0.235081	59.243	120.642	0.757006
23	81.7295	0.0465229	0.0148515	0.148214	99.2694	1.60445e-16	37.4735	0.703562	37.5184	121.347	2.21037
24	141.209	0.0894704	0.0148515	0.350912	100	5.69584e-17	36.4359	2.02907	18.9438	118.095	6.36821
Bulk Ca/K	± 1 s.d.	Bulk Cl/K	± 1 s.d.	Sample Mass (mg)	Total Gas Age (Ma)	± 1 s.d.
0.03	0.000320035	0.00161646	0.00161654	0.107753	106.506	1.27542
*Crossed-out data was not included in analysis
πRaw data corrected for MS baselines; IC deadtime; mass discrimination; procedural blank; & radioactive decay
≤Total 39Ar normalized to 100% gas delivery to the Mass Spectrometer
≥Corrected for nuclear interferences & atmospheric Ar; Only measurement errors (±1 s.d.) are included.

[truncated: 37 more sheets: 16VI10.4, 16VI10.5A, 16VI10.5B, 16VI11.7, 16VI11.11, 16VI11.12, 17VI02.01, 17VI02.04, 17VI02.05, 17VI02.06, 17VI02.07, 17VI03.01, 17VI03.02, 17VI03.03, 17VI03.04, 17VI03.05, 16VI11.5, 17VI01.01, 17VI01.02, 17VI01.03 …]
